# Supplementary material for: Deficiency of thyroid hormone receptor protects retinal pigment epithelium and photoreceptors from cell death in a mouse model of age-related macular degeneration
Source: PubMed Central journal article supplement (PMC8938501; doi:10.1038/s41419-022-04691-2), 2022-03-21
Supplement: 41419_2022_4691_MOESM1_ESM.pdf [file 41419_2022_4691_MOESM1_ESM.pdf]

*For consideration for publication in Cell Death & Disease*

**Deficiency of thyroid hormone receptor protects retinal pigment epithelium and photoreceptors from cell death in a mouse model of age-related macular degeneration**

Hongwei Ma, Fan Yang, and Xi-Qin Ding

Department of Cell Biology, University of Oklahoma Health Sciences Center, Oklahoma City,  
Oklahoma, USA

**Supplementary Information**

(Supplementary Figures 1-4, Supplementary Table 1)

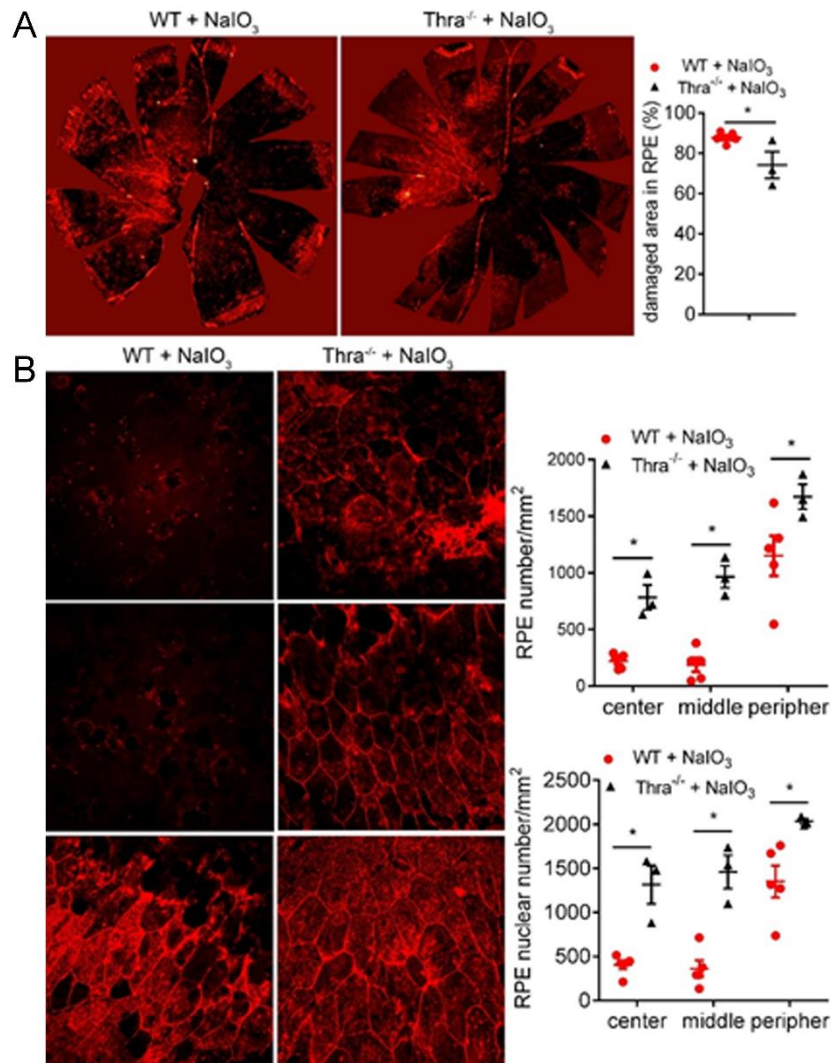

**Supplementary Figure 1. Deletion of *Thra1* protected RPE from damage/cell loss induced by NaIO<sub>3</sub> in mice at 7 months.** RPE morphology and cell loss were evaluated by phalloidin staining for F-actin and DAPI staining for nucleus on RPE whole mounts prepared from 7 months *Thra1*<sup>-/-</sup> and wild-type mice at 2 days post-NaIO<sub>3</sub> injection. **A.** Shown are representative low magnification images of phalloidin staining of the damaged area in the RPE and corresponding quantitative analysis of the damaged area. **B.** Shown are representative high magnification images of phalloidin staining taken at different regions of the RPE and corresponding quantitative analysis of RPE cell

numbers. Data are represented the mean  $\pm$  SEM for 3-5 mice per group (\*  $p < 0.05$ ; compared with wild-type mice treated with NaIO<sub>3</sub>).

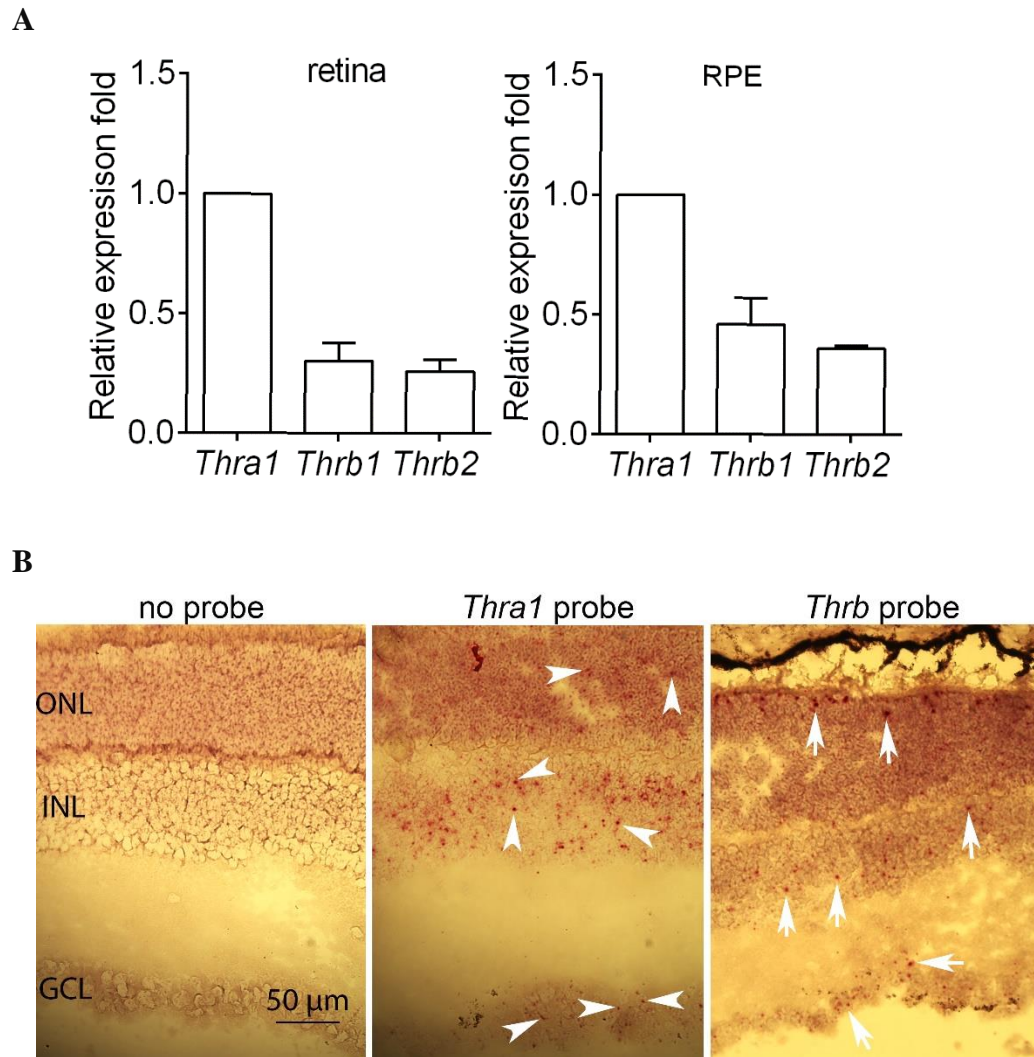

**Supplementary Figure 2. Expression of THR subtypes in the retina and RPE. A.** qRT-PCR detection of mRNA expression levels of THR subtypes in the RPE and retinas of P15 C57BL/6J mice. Data are represented as means  $\pm$  SEM for 2 assays using RPE and retinas prepared from 3 mice per group. **B.** RNAscope *in situ* hybridization detection of mRNA expression of THR subtypes on the retinal sections prepared from P20 C57BL/6J mice. Shown are representative

images of *Thral* and *Thrb* labeling on the retinal cross sections. ONL, outer nuclear layer; INL, inner nuclear layer; GCL, ganglion cell layer, arrowheads and arrows denote positive staining of *Thral* probe and *Thrb* probe, respectively.

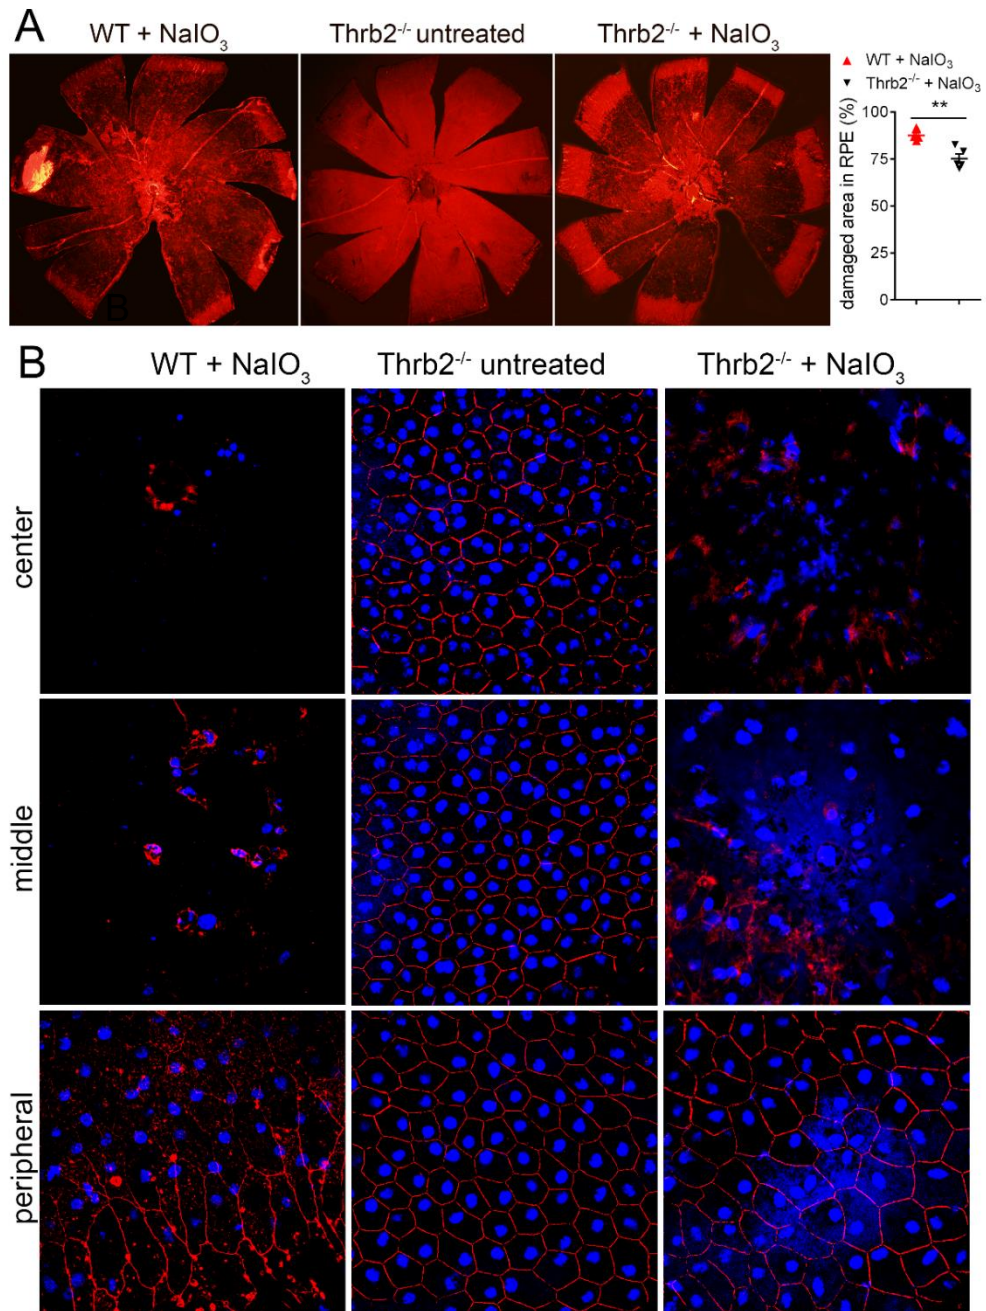

**Supplementary Figure 3. Deletion of *Thrb2* protected RPE from damage/cell loss induced by  $\text{NaIO}_3$  in mice at 17 months.** RPE morphology and cell loss were evaluated by phalloidin staining for F-actin and DAPI staining for nucleus on RPE whole mounts prepared from 17 months *Thrb2*<sup>-/-</sup> and wild-type mice at 2 days post- $\text{NaIO}_3$  injection. **A.** Shown are representative low magnification images of phalloidin staining of the damaged area in the RPE and corresponding quantitative analysis of the damaged area. **B.** Shown are representative high magnification images of phalloidin staining and DAPI labeling taken at different regions of the RPE. Data are represented as means  $\pm$  SEM for 3-6 mice per group (\*\*  $p < 0.01$ ; compared with wild-type mice treated with  $\text{NaIO}_3$ ).

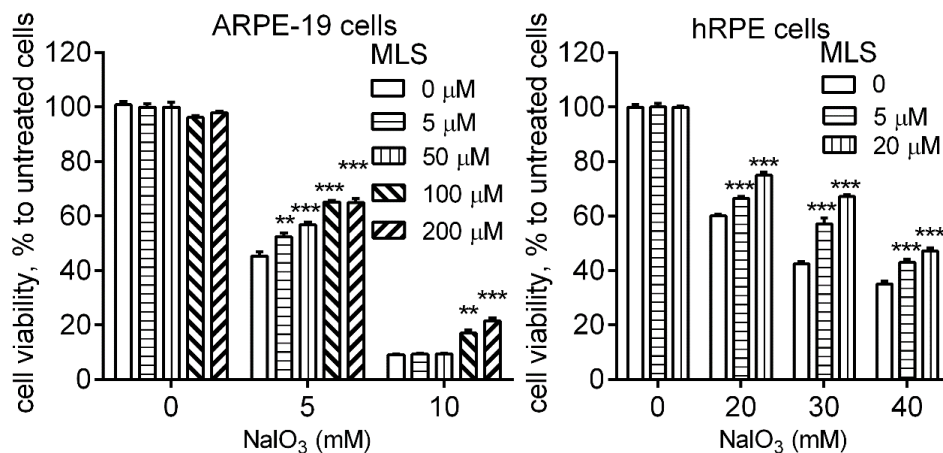

**Supplementary Figure 4. Treatment with THR antagonist MLS protected ARPE-19 cells and hRPE cells from  $\text{NaIO}_3$ -induced cell death.** ARPE-19 cells and hRPE cells cultured in RPMI-1640 medium were treated with  $\text{NaIO}_3$  at concentrations indicated in the absence and presence of various concentrations of MLS for 24 hours, and were then analyzed for cell viability by MTS assay. Shown are results of MTS assay in ARPE-19 cells and hRPE cells. Data are

represented as means  $\pm$  *SEM* for 3 independent experiments. (\*\*  $p < 0.01$ , and \*\*\*  $p < 0.001$ , compared with cells without MLS treatment).

**Supplementary Table 1. Primers used for qRT-PCR**

| <b>Gene</b>                     | <b>Forward primer</b>         | <b>Reverse primer</b>     |
|---------------------------------|-------------------------------|---------------------------|
| <i>Thra1</i>                    | AGAAGAGTCAGGAGGCCTACCT        | CCTACTCCTCATTCCCTCCTGA    |
| <i>Thra2</i>                    | AGAAGAGTCAGGAGGCCTACCT        | TGAAGAACCGGCCCTCGGAGACTT  |
| <i>Thrb1</i>                    | GTTTTCCCTCTCGTCCATCAGAGGACCTG | GCTTCCGCTTGGCTAGCCTCTTGCT |
| <i>Thrb2</i>                    | AGTCAGTCCAGCCAGCCTGCACAT      | GCTTCCGCTTGGCTAGCCTCTTGCT |
| <i>Hprt1</i>                    | GCAAACCTTTGCTTTCCCTGGTT       | CAAGGGCATATCCAACAACA      |
| <i>Casp3</i>                    | GACTGATGAGGAGATGGCTTG         | TGCAAAGGGACTGGATGAAC      |
| <i>Casp7</i>                    | CCCACTTATCTGTACCGCATG         | GGTTTTGGAAGCACTTGAAGAG    |
| <i>Casp8</i>                    | AACTTCCTAGACTGCAACCG          | TCTCAATTCCAACCTCGCTCAC    |
| <i>Gpx4</i>                     | GCAATGAGGCAAACCTGACG          | CTTGATTACTTCCTGGCTCCTG    |
| <i>Nox4</i>                     | TCCAAGCTCATTTCCACAG           | CGGAGTTCCATTACATCAGAGG    |
| <i>Ucp2</i>                     | GCATTGGCCTCTACGACTC           | AAGCGGACCTTTACCACATC      |
| <i>Gss</i>                      | GATCCTGTCCAATAACCCAG          | GCACGCTGGTCAAATATGTTC     |
| <i>Ctsb</i>                     | AGACCTGCTTACTTGCTGTG          | GGAGGGATGGTGTATGGTAAG     |
| <i>Ncf1</i>                     | TCATCCTTCAGACCTATCGGG         | ACCTCGCTTTGTCTTCATCTG     |
| <i>Ehd2</i>                     | AGCTCAACGACCTAGTGAAAC         | TCGCAAAGATGACAGGCAG       |
| <i>Ripk1</i>                    | GGAAGGATAATCGTGGAGGC          | AAGGAAGCCACACCAAGATC      |
| <i>Ripk3</i>                    | TCTTTACTGAGACTCCCGGT          | AGTTCCCAATCTGCACTTCAG     |
| <i>Mlkl</i>                     | ACTGTGAACTTGGAACCCTG          | TGCTGATGTTTCTGTGGAGTG     |
| <i>Tradd</i>                    | ACGAACTCACTAGTCTAGCAGAG       | AATACCCCAACAGCCACC        |
| <i>Tnfr1<math>\alpha</math></i> | CTTCTGTCTACTGAACTTCGGG        | CAGGCTTGTCACTCGAATTTTG    |
| <i>Tnfrsf1a</i>                 | CTCTGCTCTACGAATCACTCTG        | CACAGCATAACAGAATCGCAAG    |
| <i>Tnfrsf9</i>                  | CCTGTGATAACTGTCAGCCTG         | TCTTGAACCTGAAATAGCCTGC    |
| <i>Nlrp3</i>                    | CTCCAACCATTCTCTGACCAG         | ACAGATTGAAGTAAGGCCGG      |
| <i>Il1<math>\alpha</math></i>   | TGCAGTCCATAACCCATGATC         | ACAAACTTCTGCCTGACGAG      |
| <i>Il1<math>\beta</math></i>    | ACGGACCCCAAAGATGAAG           | TTCTCCACAGCCACAATGAG      |
| <i>Il6</i>                      | CAAAGCCAGAGTCCTTCAGAG         | GTCCTTAGCCACTCCTTCTG      |
| <i>Il22</i>                     | AGCTTGAGGTGTCCAACCTC          | GGTAGCACTGATCTTTAGCACTG   |
